# Supplementary material
Source: Elsevier journal article supplement (https://www.sciencedirect.com/science/article/pii/S1885585720303546)
Supplement: mmc1 [file S1885585720303546:mmc1.pdf]

## Risk factors for in-hospital mortality in patients with acute myocardial infarction during the COVID-19 outbreak

### SUPPLEMENTARY DATA

**Table 1 of the supplementary data**

Univariate and multivariate analyses of variables related to death in patients with AMI\* during the COVID-19 outbreak

| Variable                      | Univariate |              |        | Multivariate |            |      |
|-------------------------------|------------|--------------|--------|--------------|------------|------|
|                               | OR         | 95%CI        | P      | OR           | 95%CI      | P    |
| Age                           | 1.07       | 1.02-1.12    | .005   |              |            |      |
| COVID-19-positive             | 8.23       | 2.63-26.09   | < .001 | 6.61         | 1.82-24.43 | .02  |
| Killip-Kimball > 2            | 54.00      | 12.66-130.37 | < .001 |              |            |      |
| GRACE score > 140             | 47.91      | 6.06-78.94   | < .001 | 23.45        | 2.52-62.51 | .005 |
| TIMI flow post-PCI < 2        | 4.00       | 1.22-13.14   | .022   |              |            |      |
| LVEF < 30%                    | 19.00      | 4.55-79.32   | < .001 |              |            |      |
| Severe coronary calcification | 3.75       | 1.20-11.69   | .023   |              |            |      |
| Ventricular arrhythmia        | 20.00      | 5.26-76.07   | < .001 |              |            |      |
| ARDS                          | 81.50      | 14.25-96.23  | < .001 |              |            |      |
| CRP at admission              | 1.01       | 1.00-1.03    | .010   |              |            |      |
| CRP peak                      | 1.01       | 1.01-1.02    | < .001 |              |            |      |
| CK peak                       | 1.00       | 1.00-1.01    | .012   |              |            |      |
| AST peak                      | 1.01       | 1.00-1.01    | .050   |              |            |      |
| Ferritin peak                 | 1.01       | 1.00-1.01    | .040   |              |            |      |
| PT peak                       | 1.14       | 1.05-1.23    | .001   |              |            |      |
| COPD                          | 4.255      | 1.020-17.74  | .047   |              |            |      |
| BARC > 2                      | 9.06       | 1.38-59.52   | .022   |              |            |      |

95%CI, 95% confidence interval; ARDS; acute respiratory distress syndrome; AMI, acute myocardial infarction; AST, aspartate aminotransferase; BARC, Bleeding Academy Research Consortium; CK, total creatine kinase; COPD, chronic obstructive pulmonary disease; CRP, C-reactive protein; GRACE, Global Registry of Acute Coronary Events; LVEF, left ventricular ejection fraction; OR, odds ratio; PT, prothrombin time.

\* Comprises both non-ST-segment elevation acute myocardial infarction and ST-segment elevation myocardial infarction patients.
